# Supplementary material for: An integrated dual-gradient host facilitates oriented bottom-up lithium growth in lithium metal anodes
Source: Royal Society of Chemistry journal article supplement (doi:10.1039/d4nr02963a), 2024-01-01
Supplement: d4nr02963a1.pdf [file d4nr02963a1.pdf]

## Supplementary Information

### An integrated dual-gradient host facilitates oriented bottom-up lithium growth in lithium metal anodes

Zhuzhu Du,<sup>a,b</sup> Xin Chen,<sup>b</sup> Ying Zhao,<sup>c</sup> Yuhang Liu<sup>b\*</sup> and Wei Ai<sup>b\*</sup>

<sup>a</sup> School of Materials Science and Engineering & Institute of Flexible Electronics and Intelligent Textile, Xi'an Polytechnic University, Xi'an 710048, China

<sup>b</sup> Frontiers Science Center for Flexible Electronics & Shaanxi Institute of Flexible Electronics, Northwestern Polytechnical University, Xi'an 710072, China

<sup>c</sup> Xi'an Hongxing Electronic Paste Technology Co., Ltd., Xi'an 710199, China

Correspondence: liuyh@mail.nwpu.edu.cn, iamwai@nwpu.edu.cn

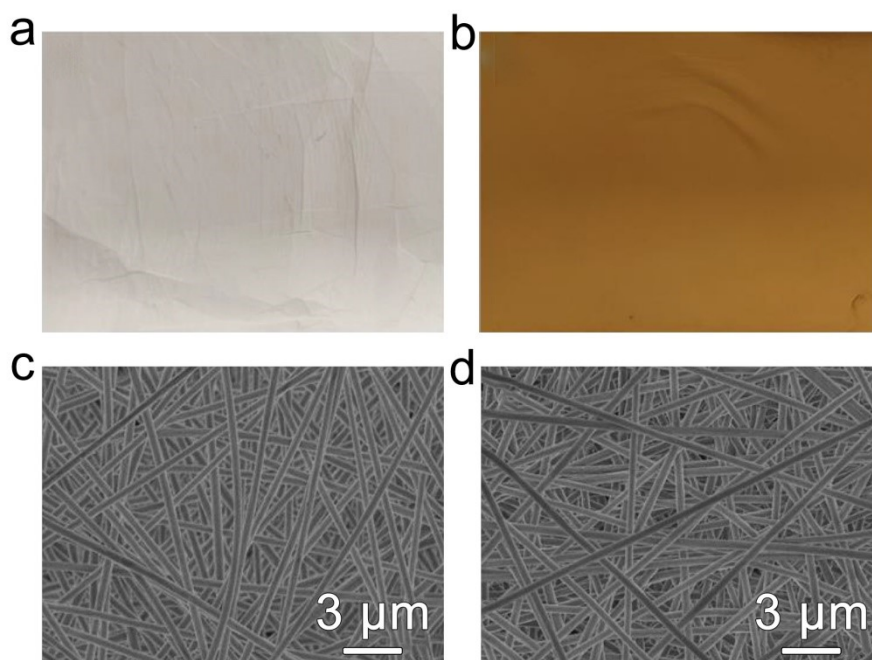

**Fig. S1** Digital photographs of (a) PAN and (b) OPAN films. SEM images of (c) PAN and (d) OPAN nanofibers.

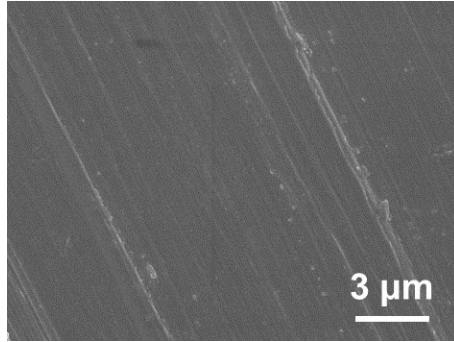

**Fig. S2** SEM image of bare Cu foil.

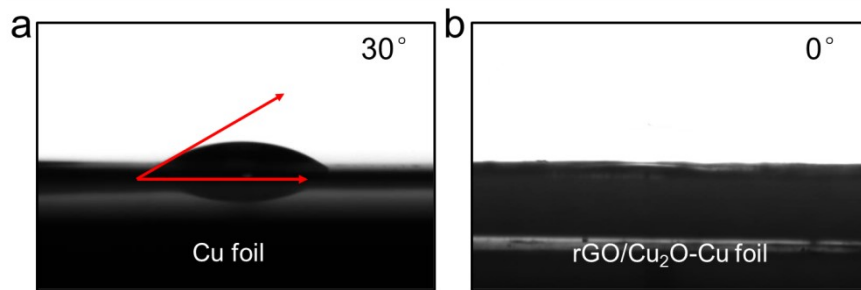

**Fig. S3** Contact angle tests of (a) Cu foil and (b) rGO/Cu<sub>2</sub>O-Cu foil.

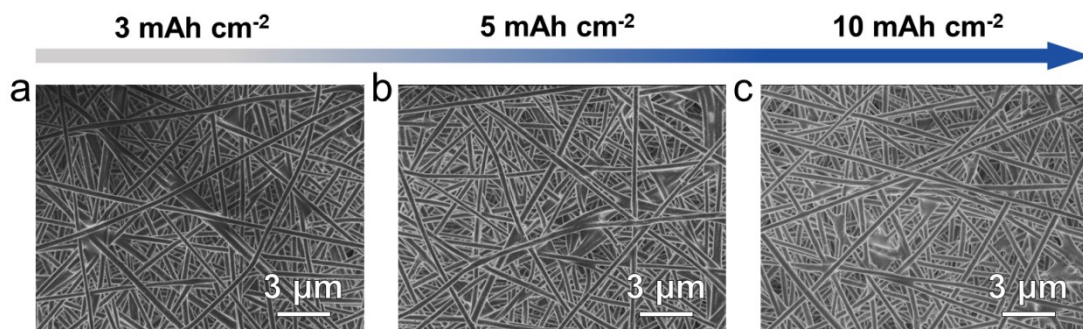

**Fig. S4** Top-view SEM images of Li deposition on the OGCC at 0.5 mA cm<sup>-2</sup>: (a) 3 mAh cm<sup>-2</sup>, (b) 5 mAh cm<sup>-2</sup>, and (c) 10 mAh cm<sup>-2</sup>.

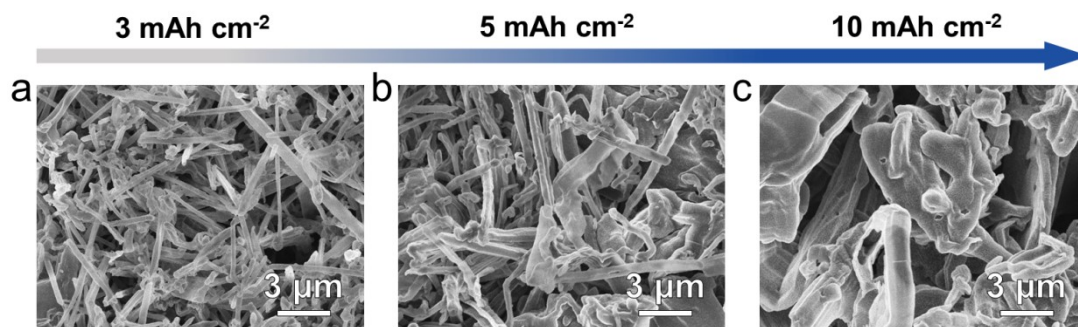

**Fig. S5** Top-view SEM images of Li deposition on the Cu foil at 0.5 mA cm<sup>-2</sup>: (a) 3 mAh cm<sup>-2</sup>, (b) 5 mAh cm<sup>-2</sup>, and (c) 10 mAh cm<sup>-2</sup>.

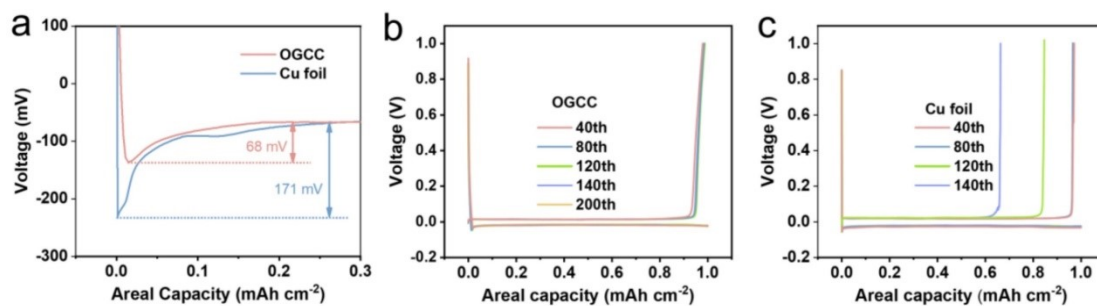

**Fig. S6** (a) Nucleation overpotential of Cu foil and OGCC. Capacity-voltage curves of (b) OGCC and (c) Cu foil under different cycles.

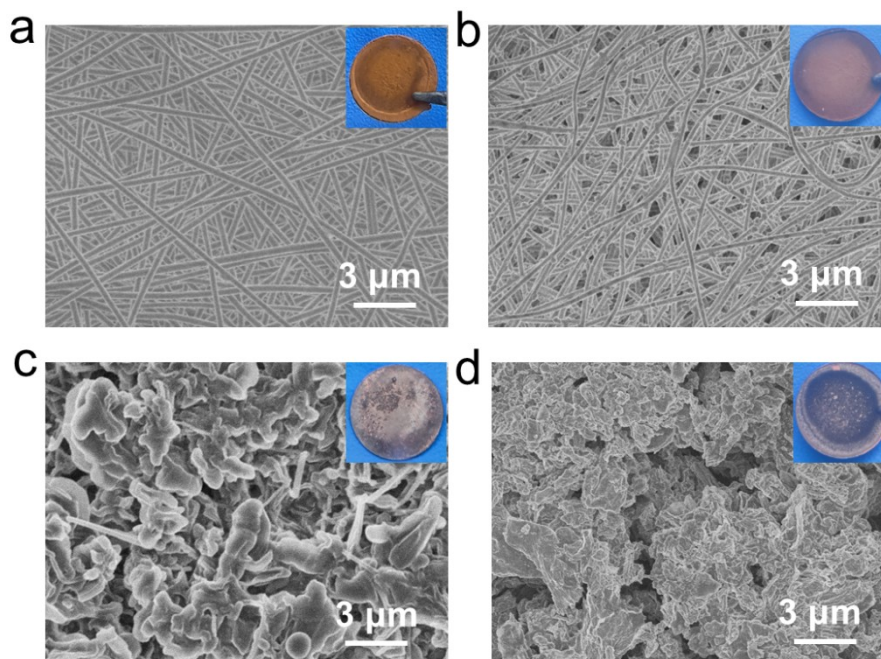

**Fig. S7** SEM images and digital photographs of (a, b) OGCC and (c, d) Cu foil at  $1 \text{ mA cm}^{-2}$  for  $1 \text{ mAh cm}^{-2}$  after (a, c) the first cycle and (b, d) 50 cycles.

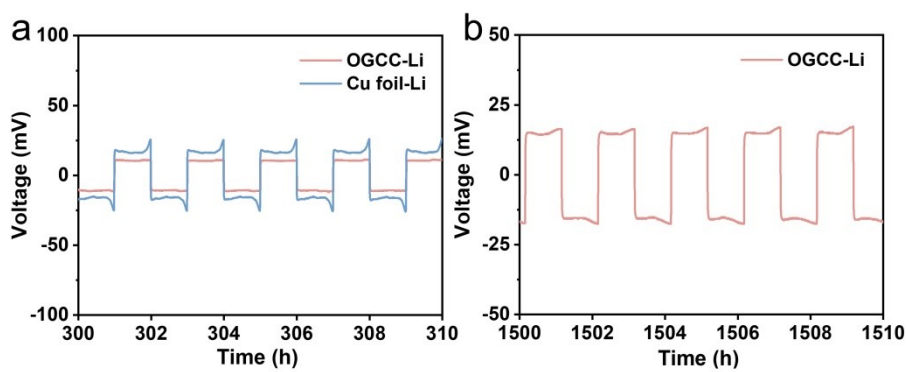

**Fig. S8** Local enlarged voltage curves of cycling performance in Figure 4c at (a) 300-310 h and (b) 1500-1510 h.

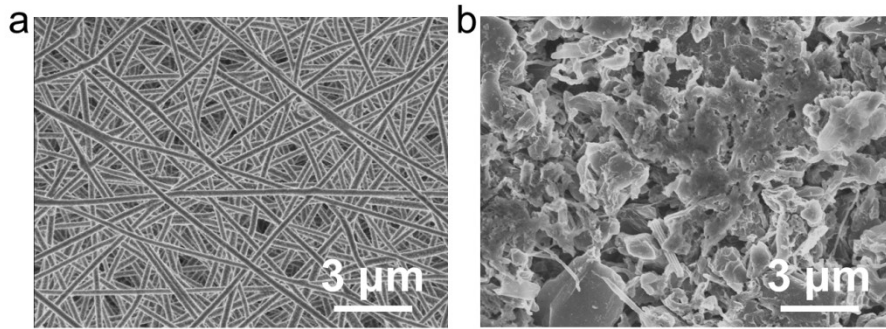

**Fig. S9** Top-view SEM images of (a) OGCC-Li and (b) Cu foil-Li electrodes after 50 cycles.
